# Supplementary material
Source: publisher figshare collection journal article supplement (https://acs.figshare.com/ndownloader/files/3620007)
Supplement: Supplementary file 1 [file 3620007]

# **Simultaneous Determination of Size and Quantification of Silica Nanoparticles by Asymmetric Flow Field-Flow Fractionation Coupled to ICPMS Using Silica Nanoparticles Standards**

Francisco Barahona, Otmar Geiss, Patricia Urbán, Isaac Ojea-Jimenez, Douglas Gilliland, Josefa Barrero-Moreno

European Commission, Joint Research Centre, Institute for Health and Consumer Protection, Via E. Fermi 2749, 21027 Ispra, VA, Italy.

## **Abstract**

In the present Supporting Information, the measured concentrations of the SiO<sub>2</sub>-NPs suspensions are reported in table S-1. Figure S-1 illustrates the efficiency of the ionisation of the different sized SiO<sub>2</sub>-NPs by comparing the signal intensity of digested and undigested suspensions. Figures S-2-4 show eluting profiles of the mixtures of SiO<sub>2</sub>-NPs standards obtained under different separation conditions of carrier composition, ionic strength and cross-flow rate.

## **Table of contents:**

|            |          |
|------------|----------|
| Table S-1  | page S-2 |
| Figure S-1 | page S-3 |
| Figure S-2 | page S-4 |
| Figure S-3 | page S-5 |
| Figure S-4 | page S-6 |

Table S-1. Concentration of SiO<sub>2</sub> in the SiO<sub>2</sub>-NPs suspensions standards obtained by ICPMS analysis and external calibration using ionic silicon (n=3).

| Sample | Concentration                          |       |
|--------|----------------------------------------|-------|
|        | (mg L <sup>-1</sup> ) 10 <sup>-3</sup> | RSD % |
| 20 nm  | 6.6                                    | 5.2   |
| 40 nm  | 50                                     | 1     |
| 60 nm  | 39.2                                   | 2.3   |
| 80 nm  | 14.8                                   | 3.3   |
| 100 nm | 29.1                                   | 1.6   |
| 150 nm | 91.7                                   | 4.1   |

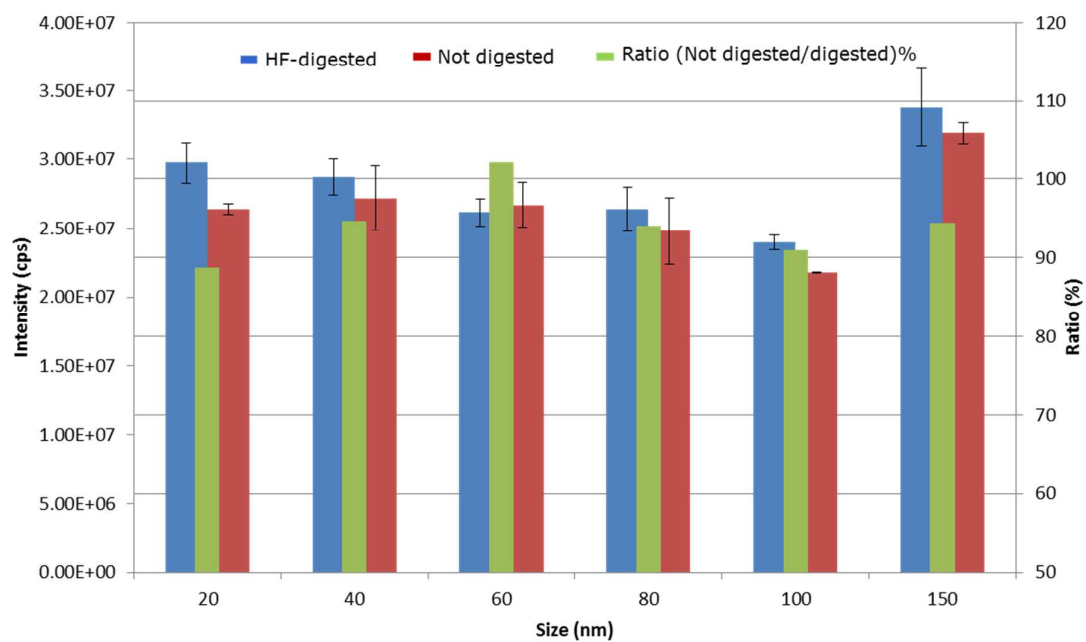

Figure S-1. Comparison of the ICPMS signal intensity of undigested and digested 10 mg L<sup>-1</sup> SiO<sub>2</sub>-NPs with HF.

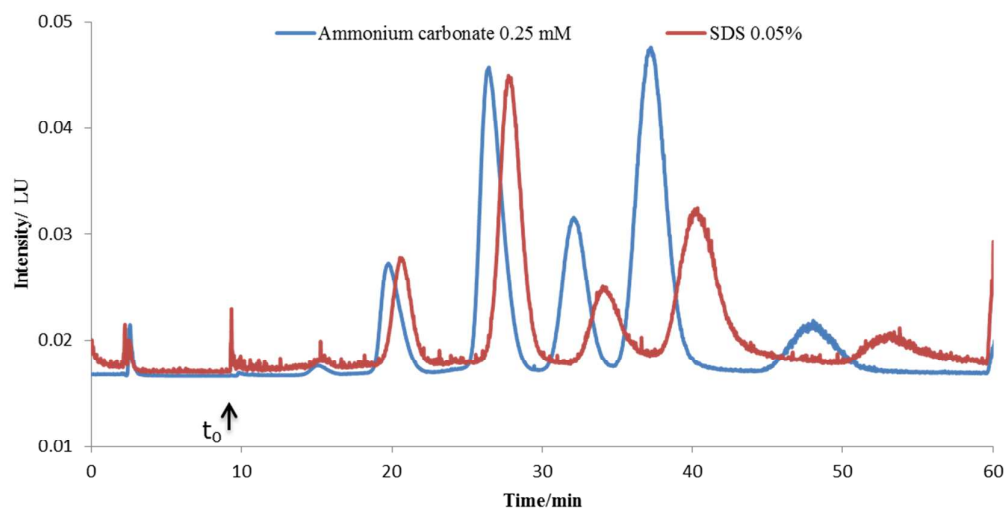

Figure S-2. Representative fractograms obtained after the injection of a mixture of SiO<sub>2</sub>-NPs with different size (concentrations between 10 µg mL<sup>-1</sup> and 1.0 µg mL<sup>-1</sup>, for smaller and bigger particles, respectively) in the AF4-MALS system, using ammonium carbonate 0.25 mM and SDS 0.05% as carrier, respectively. Peaks in every fractogram correspond to 20, 40, 60, 80, 100 and 150 nm SiO<sub>2</sub>-NPs, in order of elution.

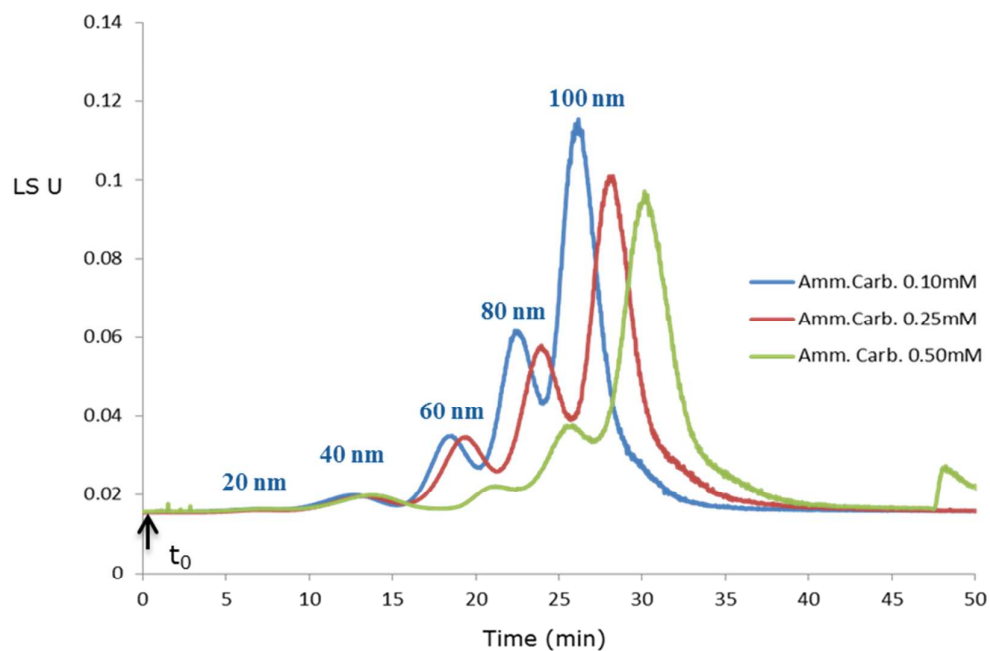

Figure S-3. Representative fractograms obtained after the injection of 50  $\mu\text{L}$  of  $2 \mu\text{g mL}^{-1}$  suspension of each 20, 40, 60, 80 and 100 nm polystyrene size standards (in order of elution, using different ammonium carbonate based buffers as AF4 carrier).

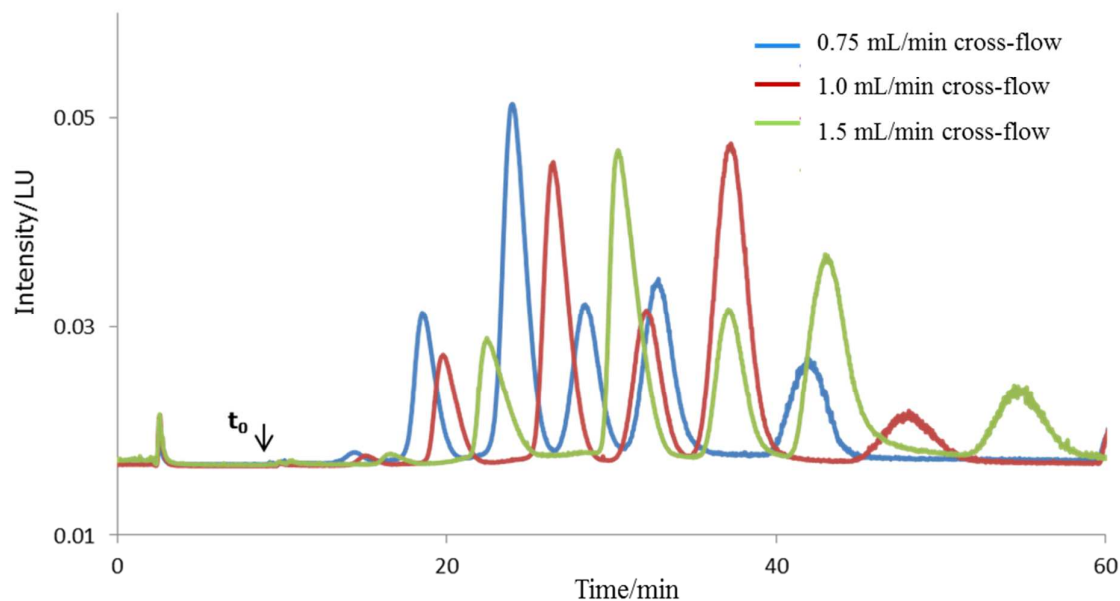

Figure S-4. Representative fractograms obtained after the injection of a mixture of SiO<sub>2</sub>-NPs standards with different sizes (concentrations between 10 µg mL<sup>-1</sup> and 1.0 µg mL<sup>-1</sup>, for smaller and bigger particles, respectively) in the AF4-MALS system, under different cross-flow rate settings using ammonium carbonate 0.25 mM as carrier. Peaks in every fractogram correspond to 20, 40, 60, 80, 100 and 150 nm SiO<sub>2</sub>-NPs, in order of elution.
